# Supplementary material
Source: MDPI journal article supplement (https://www.mdpi.com/2071-1050/16/10/4028)
Supplement: s1 [file s1]

# ANNEX 1

## Public lighting factors research survey

This survey is aimed to collect public opinion about the importance of several factors in the safety, security and well-being provided by public lighting. It will take five minutes to completely answer this anonymous survey. Please choose a moment of the day when you are relaxed, not thirsty or hungry, and not expecting to be interrupted. Thank you for taking some minutes to collaborate with our research.

1. In what country do you live? \*

- ☐ Afghanistan
- ☐ Akrotiri
- ☐ Albania
- ☐ Algeria
- ☐ American Samoa
- ☐ Andorra
- ☐ Angola
- ☐ Anguilla
- ☐ Antarctica
- ☐ Antigua and Barbuda
- ☐ Argentina
- ☐ Armenia
- ☐ Aruba
- ☐ Ashmore and Cartier Islands
- ☐ Australia
- ☐ Austria
- ☐ Azerbaijan
- ☐ Bahamas, The
- ☐ Bahrain
- ☐ Bangladesh
- ☐ Barbados
- ☐ Bassas da India
- ☐ Belarus
- ☐ Belgium
- ☐ Belize
- ☐ Benin
- ☐ Bermuda
- ☐ Bhutan
- ☐ Bolivia
- ☐ Bosnia and Herzegovina

- ☐ Botswana
- ☐ Bouvet Island
- ☐ Brazil
- ☐ British Indian Ocean Territory
- ☐ British Virgin Islands
- ☐ Brunei
- ☐ Bulgaria
- ☐ Burkina Faso
- ☐ Burma
- ☐ Burundi
- ☐ Cambodia
- ☐ Cameroon
- ☐ Canada
- ☐ Cape Verde
- ☐ Cayman Islands
- ☐ Central African Republic
- ☐ Chad
- ☐ Chile
- ☐ China
- ☐ Christmas Island
- ☐ Clipperton Island
- ☐ Cocos (Keeling) Islands
- ☐ Colombia
- ☐ Comoros
- ☐ Congo, Democratic Republic of the
- ☐ Congo, Republic of the
- ☐ Cook Islands
- ☐ Coral Sea Islands
- ☐ Costa Rica
- ☐ Cote d'Ivoire
- ☐ Croatia
- ☐ Cuba
- ☐ Cyprus

- ☐ Czech Republic
- ☐ Denmark
- ☐ Dhekelia
- ☐ Djibouti
- ☐ Dominica
- ☐ Dominican Republic
- ☐ Ecuador
- ☐ Egypt
- ☐ El Salvador
- ☐ Equatorial Guinea
- ☐ Eritrea
- ☐ Estonia
- ☐ Ethiopia
- ☐ Europa Island
- ☐ Falkland Islands (Islas Malvinas)
- ☐ Faroe Islands
- ☐ Fiji
- ☐ Finland
- ☐ France
- ☐ French Guiana
- ☐ French Polynesia
- ☐ French Southern and Antarctic Lands
- ☐ Gabon
- ☐ Gambia, The
- ☐ Gaza Strip
- ☐ Georgia
- ☐ Germany
- ☐ Ghana
- ☐ Gibraltar
- ☐ Glorioso Islands
- ☐ Greece
- ☐ Greenland
- ☐ Grenada

- ☐ Guadeloupe
- ☐ Guam
- ☐ Guatemala
- ☐ Guernsey
- ☐ Guinea
- ☐ Guinea-Bissau
- ☐ Guyana
- ☐ Haiti
- ☐ Heard Island and McDonald Islands
- ☐ Holy See (Vatican City)
- ☐ Honduras
- ☐ Hong Kong
- ☐ Hungary
- ☐ Iceland
- ☐ India
- ☐ Indonesia
- ☐ Iran
- ☐ Iraq
- ☐ Ireland
- ☐ Isle of Man
- ☐ Israel
- ☐ Italy
- ☐ Jamaica
- ☐ Jan Mayen
- ☐ Japan
- ☐ Jersey
- ☐ Jordan
- ☐ Juan de Nova Island
- ☐ Kazakhstan
- ☐ Kenya
- ☐ Kiribati
- ☐ Korea, North
- ☐ Korea, South

- ☐ Kuwait
- ☐ Kyrgyzstan
- ☐ Laos
- ☐ Latvia
- ☐ Lebanon
- ☐ Lesotho
- ☐ Liberia
- ☐ Libya
- ☐ Liechtenstein
- ☐ Lithuania
- ☐ Luxembourg
- ☐ Macau
- ☐ Macedonia
- ☐ Madagascar
- ☐ Malawi
- ☐ Malaysia
- ☐ Maldives
- ☐ Mali
- ☐ Malta
- ☐ Marshall Islands
- ☐ Martinique
- ☐ Mauritania
- ☐ Mauritius
- ☐ Mayotte
- ☐ Mexico
- ☐ Micronesia, Federated States of
- ☐ Moldova
- ☐ Monaco
- ☐ Mongolia
- ☐ Montserrat
- ☐ Morocco
- ☐ Mozambique
- ☐ Namibia

- ☐ Nauru
- ☐ Navassa Island
- ☐ Nepal
- ☐ Netherlands
- ☐ Netherlands Antilles
- ☐ New Caledonia
- ☐ New Zealand
- ☐ Nicaragua
- ☐ Niger
- ☐ Nigeria
- ☐ Niue
- ☐ Norfolk Island
- ☐ Northern Mariana Islands
- ☐ Norway
- ☐ Oman
- ☐ Pakistan
- ☐ Palau
- ☐ Panama
- ☐ Papua New Guinea
- ☐ Paracel Islands
- ☐ Paraguay
- ☐ Peru
- ☐ Philippines
- ☐ Pitcairn Islands
- ☐ Poland
- ☐ Portugal
- ☐ Puerto Rico
- ☐ Qatar
- ☐ Reunion
- ☐ Romania
- ☐ Russia
- ☐ Rwanda
- ☐ Saint Helena

- ☐ Saint Kitts and Nevis
- ☐ Saint Lucia
- ☐ Saint Pierre and Miquelon
- ☐ Saint Vincent and the Grenadines
- ☐ Samoa
- ☐ San Marino
- ☐ Sao Tome and Principe
- ☐ Saudi Arabia
- ☐ Senegal
- ☐ Serbia and Montenegro
- ☐ Seychelles
- ☐ Sierra Leone
- ☐ Singapore
- ☐ Slovakia
- ☐ Slovenia
- ☐ Solomon Islands
- ☐ Somalia
- ☐ South Africa
- ☐ South Georgia and the South Sandwich Islands
- ☐ Spain
- ☐ Spratly Islands
- ☐ Sri Lanka
- ☐ Sudan
- ☐ Suriname
- ☐ Svalbard
- ☐ Swaziland
- ☐ Sweden
- ☐ Switzerland
- ☐ Syria
- ☐ Taiwan
- ☐ Tajikistan
- ☐ Tanzania
- ☐ Thailand

- ☐ Timor-Leste
- ☐ Togo
- ☐ Tokelau
- ☐ Tonga
- ☐ Trinidad and Tobago
- ☐ Tromelin Island
- ☐ Tunisia
- ☐ Turkey
- ☐ Turkmenistan
- ☐ Turks and Caicos Islands
- ☐ Tuvalu
- ☐ Uganda
- ☐ Ukraine
- ☐ United Arab Emirates
- ☐ United Kingdom
- ☐ United States
- ☐ Uruguay
- ☐ Uzbekistan
- ☐ Vanuatu
- ☐ Venezuela
- ☐ Vietnam
- ☐ Virgin Islands
- ☐ Wake Island
- ☐ Wallis and Futuna
- ☐ West Bank
- ☐ Western Sahara
- ☐ Yemen
- ☐ Zambia
- ☐ Zimbabwe



2. What is your age? \*

☐ <25

☐ 26-35

☐ 36-45

☐ 46-55

☐ 56-65

☐ 66-75

☐ 76-85

☐ >86

3. What is your gender? \*

☐ Male

☐ Female

☐ Other

4. What is your educational level? \*

☐ Primary school

☐ Secondary School or vocational training

☐ University degree

☐ University post-graduated

### SAFETY & SECURITY factors rating

Imagine that you are walking alone during the night along one given street. Please rate the relevance (influence) of the following factors referred to that street (1=irrelevant, 5=very important). Keep in mind that we are looking for relevance, either it is a positive or negative one.

5. How relevant for your feeling of SAFETY AND SECURITY is the WEATHER? \*

|                       |                       |                       |                       |                       |
|-----------------------|-----------------------|-----------------------|-----------------------|-----------------------|
| 1                     | 2                     | 3                     | 4                     | 5                     |
| <input type="radio"/> |

6. How relevant for your feeling of SAFETY AND SECURITY is the presence of TREES? \*

|                       |                       |                       |                       |                       |
|-----------------------|-----------------------|-----------------------|-----------------------|-----------------------|
| 1                     | 2                     | 3                     | 4                     | 5                     |
| <input type="radio"/> |

7. How relevant for your feeling of SAFETY AND SECURITY is the presence of TRAFFIC? \*

|                       |                       |                       |                       |                       |
|-----------------------|-----------------------|-----------------------|-----------------------|-----------------------|
| 1                     | 2                     | 3                     | 4                     | 5                     |
| <input type="radio"/> |

8. How relevant for your feeling of SAFETY AND SECURITY is the COLOUR OF THE LIGHT emitted by the public lighting systems? \*

|                       |                       |                       |                       |                       |
|-----------------------|-----------------------|-----------------------|-----------------------|-----------------------|
| 1                     | 2                     | 3                     | 4                     | 5                     |
| <input type="radio"/> |

9. How relevant for your feeling of SAFETY AND SECURITY is the SOCIOECONOMIC LEVEL OF THE NEIGHBOURHOOD?

\*

| 1                     | 2                     | 3                     | 4                     | 5                     |
|-----------------------|-----------------------|-----------------------|-----------------------|-----------------------|
| <input type="radio"/> |

10. How relevant for your feeling of SAFETY AND SECURITY is the presence of SHADOWS (cast by trees, buildings, obstacles, etc)?

\*

| 1                     | 2                     | 3                     | 4                     | 5                     |
|-----------------------|-----------------------|-----------------------|-----------------------|-----------------------|
| <input type="radio"/> |

11. How relevant for your feeling of SAFETY AND SECURITY is the happening of RECENT INCIDENTS in the area?

\*

| 1                     | 2                     | 3                     | 4                     | 5                     |
|-----------------------|-----------------------|-----------------------|-----------------------|-----------------------|
| <input type="radio"/> |

12. How relevant for your feeling of SAFETY AND SECURITY is the presence of PEOPLE?

\*

| 1                     | 2                     | 3                     | 4                     | 5                     |
|-----------------------|-----------------------|-----------------------|-----------------------|-----------------------|
| <input type="radio"/> |

13. How relevant for your feeling of SAFETY AND SECURITY is the presence of PARKED CARS? \*

|                       |                       |                       |                       |                       |
|-----------------------|-----------------------|-----------------------|-----------------------|-----------------------|
| 1                     | 2                     | 3                     | 4                     | 5                     |
| <input type="radio"/> |

14. How relevant for your feeling of SAFETY AND SECURITY is the presence of OBSTACLES (bollards, etc)? \*

|                       |                       |                       |                       |                       |
|-----------------------|-----------------------|-----------------------|-----------------------|-----------------------|
| 1                     | 2                     | 3                     | 4                     | 5                     |
| <input type="radio"/> |

15. How relevant for your feeling of SAFETY AND SECURITY is the level of NOISE in the street? \*

|                       |                       |                       |                       |                       |
|-----------------------|-----------------------|-----------------------|-----------------------|-----------------------|
| 1                     | 2                     | 3                     | 4                     | 5                     |
| <input type="radio"/> |

16. How relevant for your feeling of SAFETY AND SECURITY is the PAVEMENT materials and its maintenance status? \*

|                       |                       |                       |                       |                       |
|-----------------------|-----------------------|-----------------------|-----------------------|-----------------------|
| 1                     | 2                     | 3                     | 4                     | 5                     |
| <input type="radio"/> |

17. How relevant for your feeling of SAFETY AND SECURITY is the MORPHOLOGY OF THE STREET (open, surrounded by buildings, wide, narrow, etc)? \*

| 1                     | 2                     | 3                     | 4                     | 5                     |
|-----------------------|-----------------------|-----------------------|-----------------------|-----------------------|
| <input type="radio"/> |

18. How relevant for your feeling of SAFETY AND SECURITY is the HOUR OF THE DAY? \*

| 1                     | 2                     | 3                     | 4                     | 5                     |
|-----------------------|-----------------------|-----------------------|-----------------------|-----------------------|
| <input type="radio"/> |

19. How relevant for your feeling of SAFETY AND SECURITY is the REPUTATION OF THE NEIGHBOURHOOD? \*

| 1                     | 2                     | 3                     | 4                     | 5                     |
|-----------------------|-----------------------|-----------------------|-----------------------|-----------------------|
| <input type="radio"/> |

20. How relevant for your feeling of SAFETY AND SECURITY are YOUR OWN personal distractions (mobile phone, music, etc)? \*

| 1                     | 2                     | 3                     | 4                     | 5                     |
|-----------------------|-----------------------|-----------------------|-----------------------|-----------------------|
| <input type="radio"/> |

21. How relevant for your feeling of SAFETY AND SECURITY is the CULTURAL BACKGROUND OF THE NEIGHBOURHOOD? \*

|                       |                       |                       |                       |                       |
|-----------------------|-----------------------|-----------------------|-----------------------|-----------------------|
| 1                     | 2                     | 3                     | 4                     | 5                     |
| <input type="radio"/> |

22. How relevant for your feeling of SAFETY AND SECURITY is the CRIMINALITY RATE of the neighbourhood? \*

|                       |                       |                       |                       |                       |
|-----------------------|-----------------------|-----------------------|-----------------------|-----------------------|
| 1                     | 2                     | 3                     | 4                     | 5                     |
| <input type="radio"/> |

23. How relevant for your feeling of SAFETY AND SECURITY is YOUR OWN age? \*

|                       |                       |                       |                       |                       |
|-----------------------|-----------------------|-----------------------|-----------------------|-----------------------|
| 1                     | 2                     | 3                     | 4                     | 5                     |
| <input type="radio"/> |

### WELL-BEING factors rating

Imagine that you are walking alone during the night along one given street. Please rate the relevance (influence) of the following factors referred to that street (1=irrelevant, 5=very important). Keep in mind that we are looking for relevance, either it is a positive or negative one.

24. How relevant for your WELL-BEING is the WEATHER? \*

| 1                     | 2                     | 3                     | 4                     | 5                     |
|-----------------------|-----------------------|-----------------------|-----------------------|-----------------------|
| <input type="radio"/> |

25. How relevant for your WELL-BEING is the presence of TREES? \*

| 1                     | 2                     | 3                     | 4                     | 5                     |
|-----------------------|-----------------------|-----------------------|-----------------------|-----------------------|
| <input type="radio"/> |

26. How relevant for your WELL-BEING is the presence of TRAFFIC? \*

| 1                     | 2                     | 3                     | 4                     | 5                     |
|-----------------------|-----------------------|-----------------------|-----------------------|-----------------------|
| <input type="radio"/> |

27. How relevant for your WELL-BEING is the COLOUR OF THE LIGHT emitted by the public lighting systems? \*

| 1                     | 2                     | 3                     | 4                     | 5                     |
|-----------------------|-----------------------|-----------------------|-----------------------|-----------------------|
| <input type="radio"/> |

28. How relevant for your WELL-BEING is the SOCIOECONOMIC LEVEL OF THE NEIGHBOURHOOD? \*

| 1                     | 2                     | 3                     | 4                     | 5                     |
|-----------------------|-----------------------|-----------------------|-----------------------|-----------------------|
| <input type="radio"/> |

29. How relevant for your WELL-BEING is the presence of SHADOWS (cast by trees, buildings, obstacles, etc)? \*

| 1                     | 2                     | 3                     | 4                     | 5                     |
|-----------------------|-----------------------|-----------------------|-----------------------|-----------------------|
| <input type="radio"/> |

30. How relevant for your WELL-BEING is the happening of RECENT INCIDENTS in the area? \*

| 1                     | 2                     | 3                     | 4                     | 5                     |
|-----------------------|-----------------------|-----------------------|-----------------------|-----------------------|
| <input type="radio"/> |

31. How relevant for your WELL-BEING is the presence of PEOPLE? \*

| 1                     | 2                     | 3                     | 4                     | 5                     |
|-----------------------|-----------------------|-----------------------|-----------------------|-----------------------|
| <input type="radio"/> |



32. How relevant for your WELL-BEING is the presence of PARKED CARS? \*

| 1                     | 2                     | 3                     | 4                     | 5                     |
|-----------------------|-----------------------|-----------------------|-----------------------|-----------------------|
| <input type="radio"/> |

33. How relevant for your WELL-BEING is the presence of OBSTACLES (bollards, etc)? \*

| 1                     | 2                     | 3                     | 4                     | 5                     |
|-----------------------|-----------------------|-----------------------|-----------------------|-----------------------|
| <input type="radio"/> |

34. How relevant for your WELL-BEING is the level of NOISE in the street? \*

| 1                     | 2                     | 3                     | 4                     | 5                     |
|-----------------------|-----------------------|-----------------------|-----------------------|-----------------------|
| <input type="radio"/> |

35. How relevant for your WELL-BEING is the PAVEMENT materials and its maintenance status? \*

| 1                     | 2                     | 3                     | 4                     | 5                     |
|-----------------------|-----------------------|-----------------------|-----------------------|-----------------------|
| <input type="radio"/> |

36. How relevant for your WELL-BEING is the MORPHOLOGY OF THE STREET (open, surrounded by buildings, wide, narrow, etc)?

\*

| 1                     | 2                     | 3                     | 4                     | 5                     |
|-----------------------|-----------------------|-----------------------|-----------------------|-----------------------|
| <input type="radio"/> |

37. How relevant for your WELL-BEING is the HOUR OF THE DAY? \*

| 1                     | 2                     | 3                     | 4                     | 5                     |
|-----------------------|-----------------------|-----------------------|-----------------------|-----------------------|
| <input type="radio"/> |

38. How relevant for your WELL-BEING is the REPUTATION OF THE NEIGHBOURHOOD?

\*

| 1                     | 2                     | 3                     | 4                     | 5                     |
|-----------------------|-----------------------|-----------------------|-----------------------|-----------------------|
| <input type="radio"/> |

39. How relevant for your WELL-BEING are YOUR OWN personal distractions (mobile phone, music, etc)?

\*

| 1                     | 2                     | 3                     | 4                     | 5                     |
|-----------------------|-----------------------|-----------------------|-----------------------|-----------------------|
| <input type="radio"/> |

40. How relevant for your WELL-BEING is the CULTURAL BACKGROUND OF THE NEIGHBOURHOOD? \*

1 2 3 4 5

☐ ☐ ☐ ☐ ☐

41. How relevant for your WELL-BEING is the CRIMINALITY RATE of the neighbourhood? \*

1 2 3 4 5

☐ ☐ ☐ ☐ ☐

42. How relevant for your WELL-BEING is YOUR OWN age? \*

1 2 3 4 5

☐ ☐ ☐ ☐ ☐
